# Supplementary material
Source: ML conference proceedings conference paper supplement (https://openreview.net/forum?id=NfhVTi2G4a)

# Gaussian vs Gamma ( $\log_2$ - $\log_2$ scale)

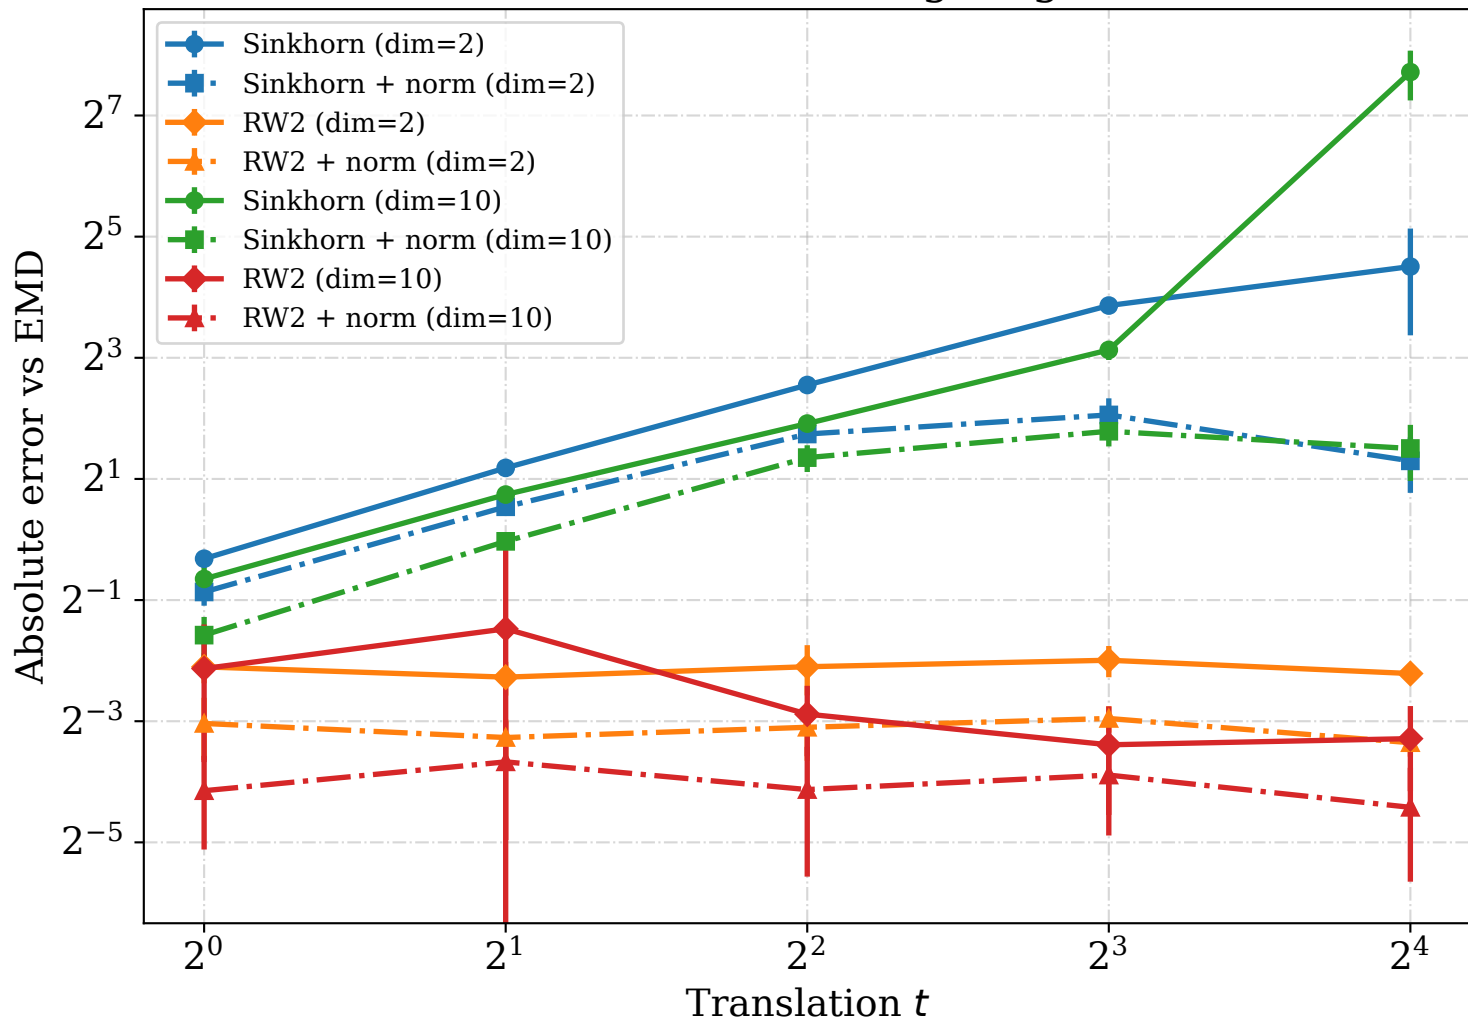

Supplement: supplementary_material [file Gaussian_vs_Gamma_error.pdf › exp2/results_figs/Gaussian_vs_Gamma_error.pdf]

# Gaussian vs Gamma (log<sub>2</sub>-linear scale)

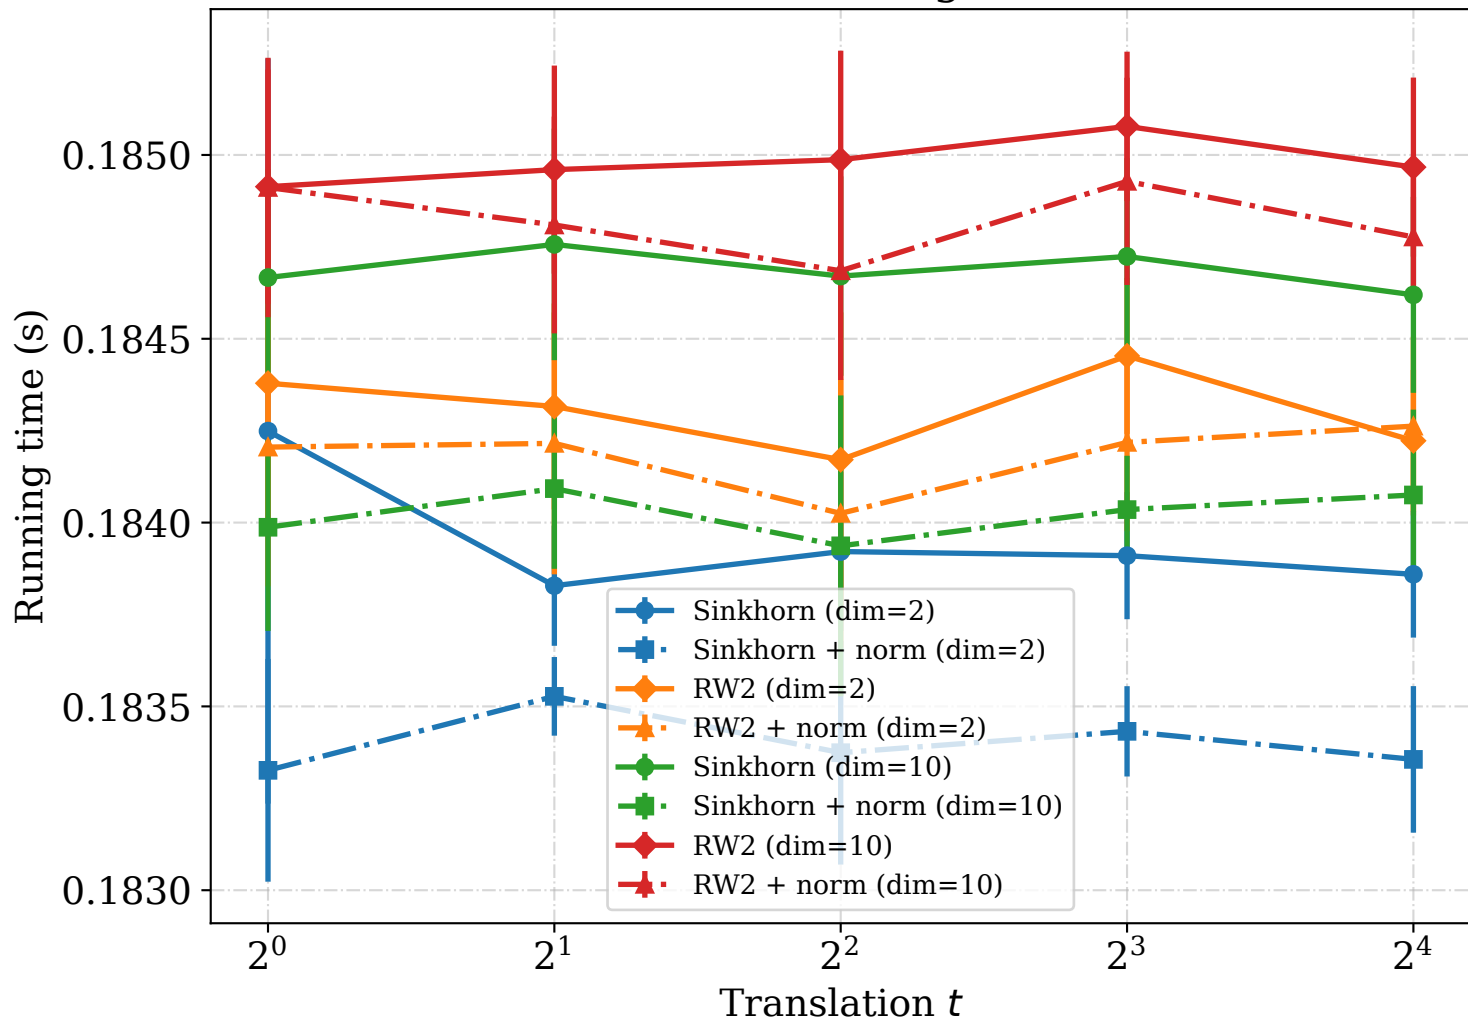

Supplement: supplementary_material [file Gaussian_vs_Gamma_time.pdf › exp2/results_figs/Gaussian_vs_Gamma_time.pdf]

# Gaussian vs Gaussian ( $\log_2$ - $\log_2$ scale)

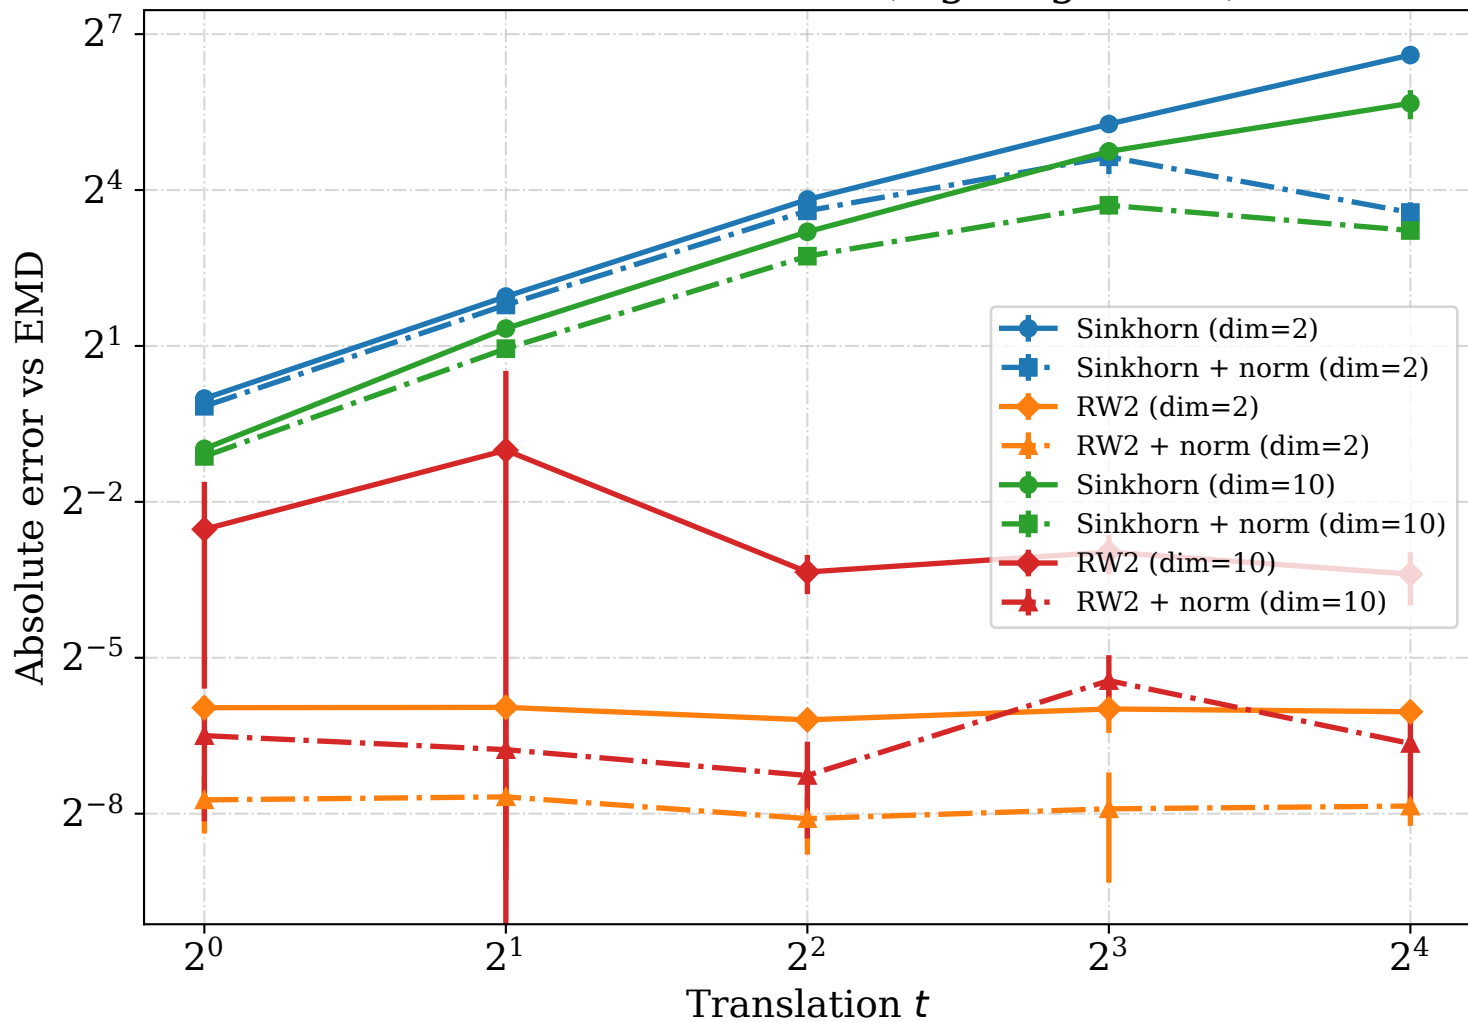

Supplement: supplementary_material [file Gaussian_vs_Gaussian_error.pdf › exp2/results_figs/Gaussian_vs_Gaussian_error.pdf]

## Gaussian vs Gaussian ( $\log_2$ -linear scale)

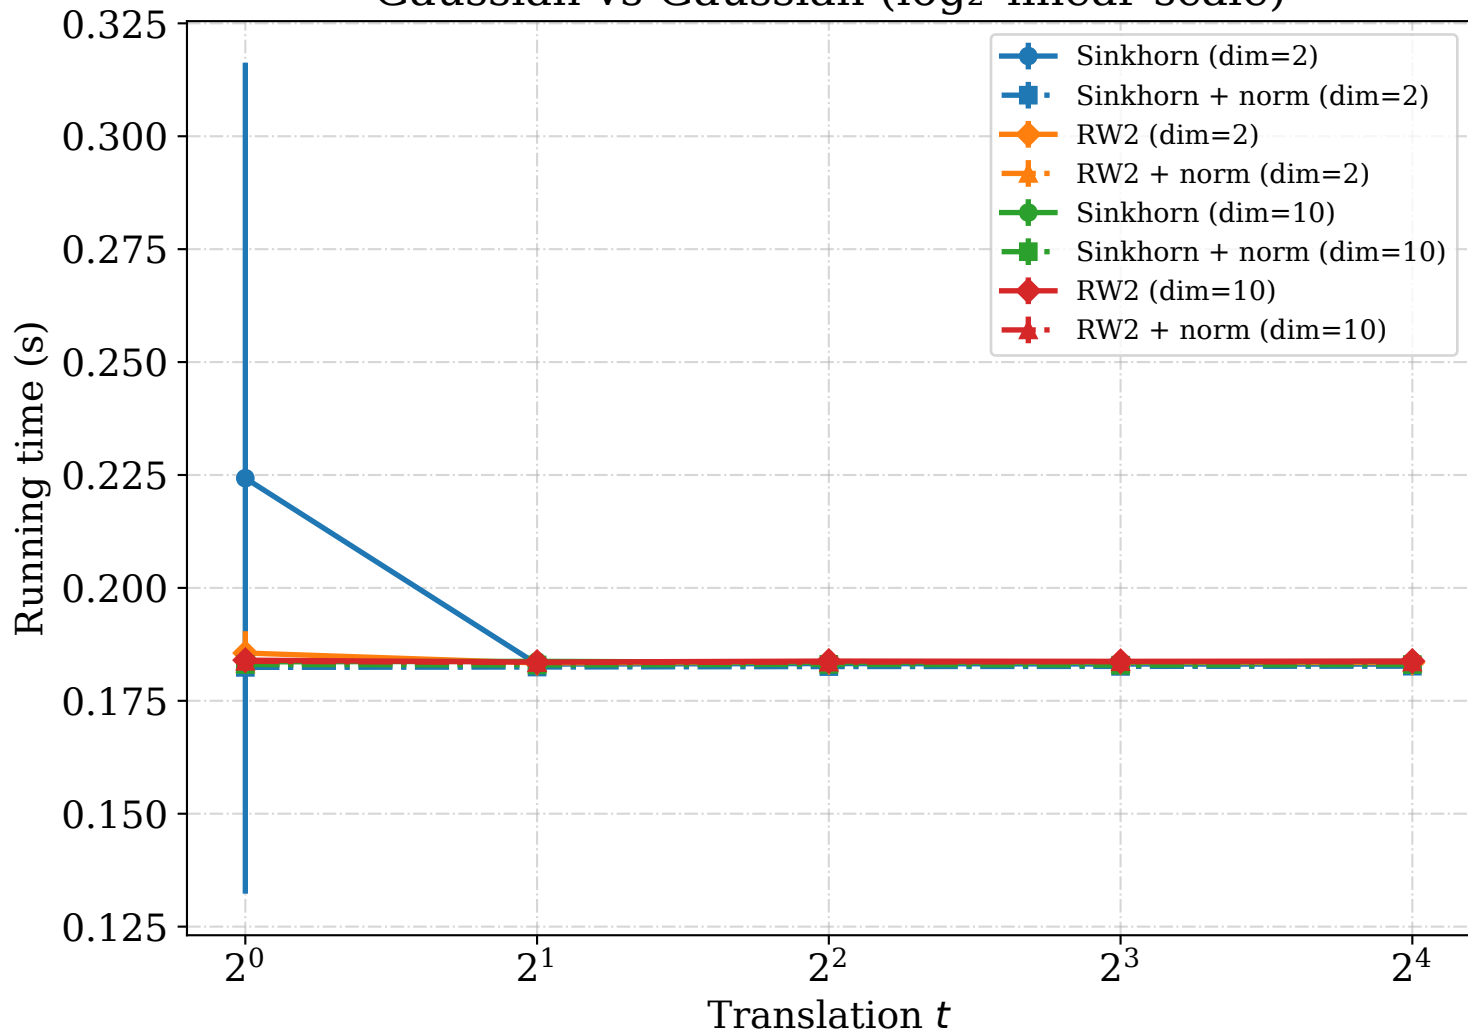

Supplement: supplementary_material [file Gaussian_vs_Gaussian_time.pdf › exp2/results_figs/Gaussian_vs_Gaussian_time.pdf]

# Gaussian vs Geometric ( $\log_2$ - $\log_2$ scale)

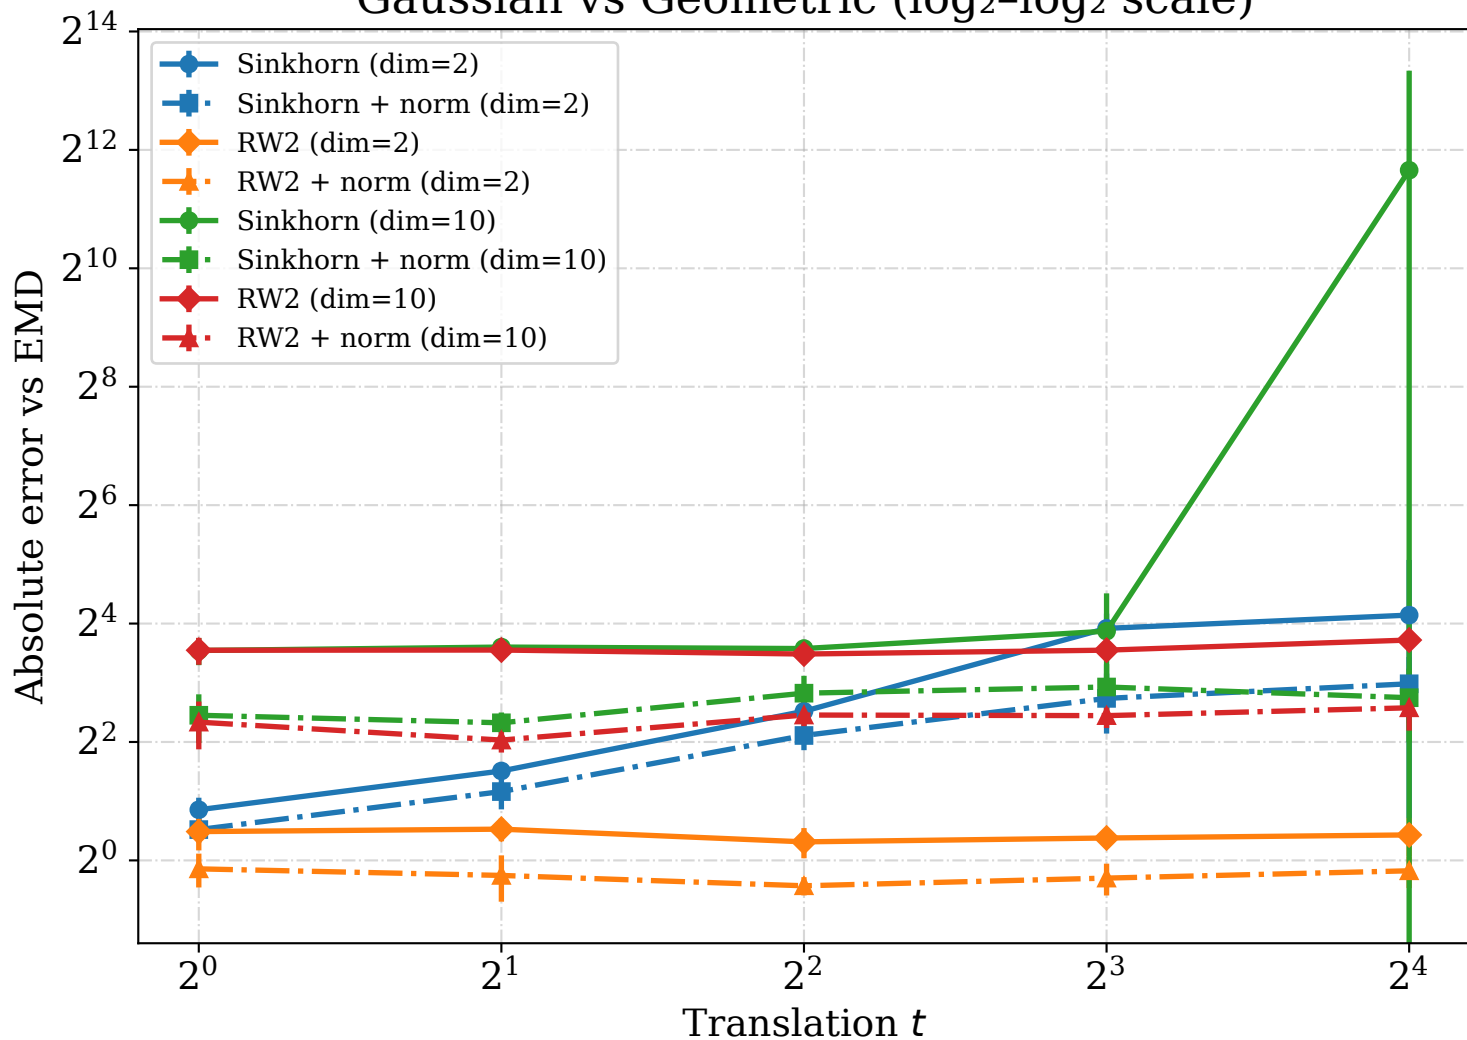

Supplement: supplementary_material [file Gaussian_vs_Geometric_error.pdf › exp2/results_figs/Gaussian_vs_Geometric_error.pdf]

# Gaussian vs Geometric (log<sub>2</sub>-linear scale)

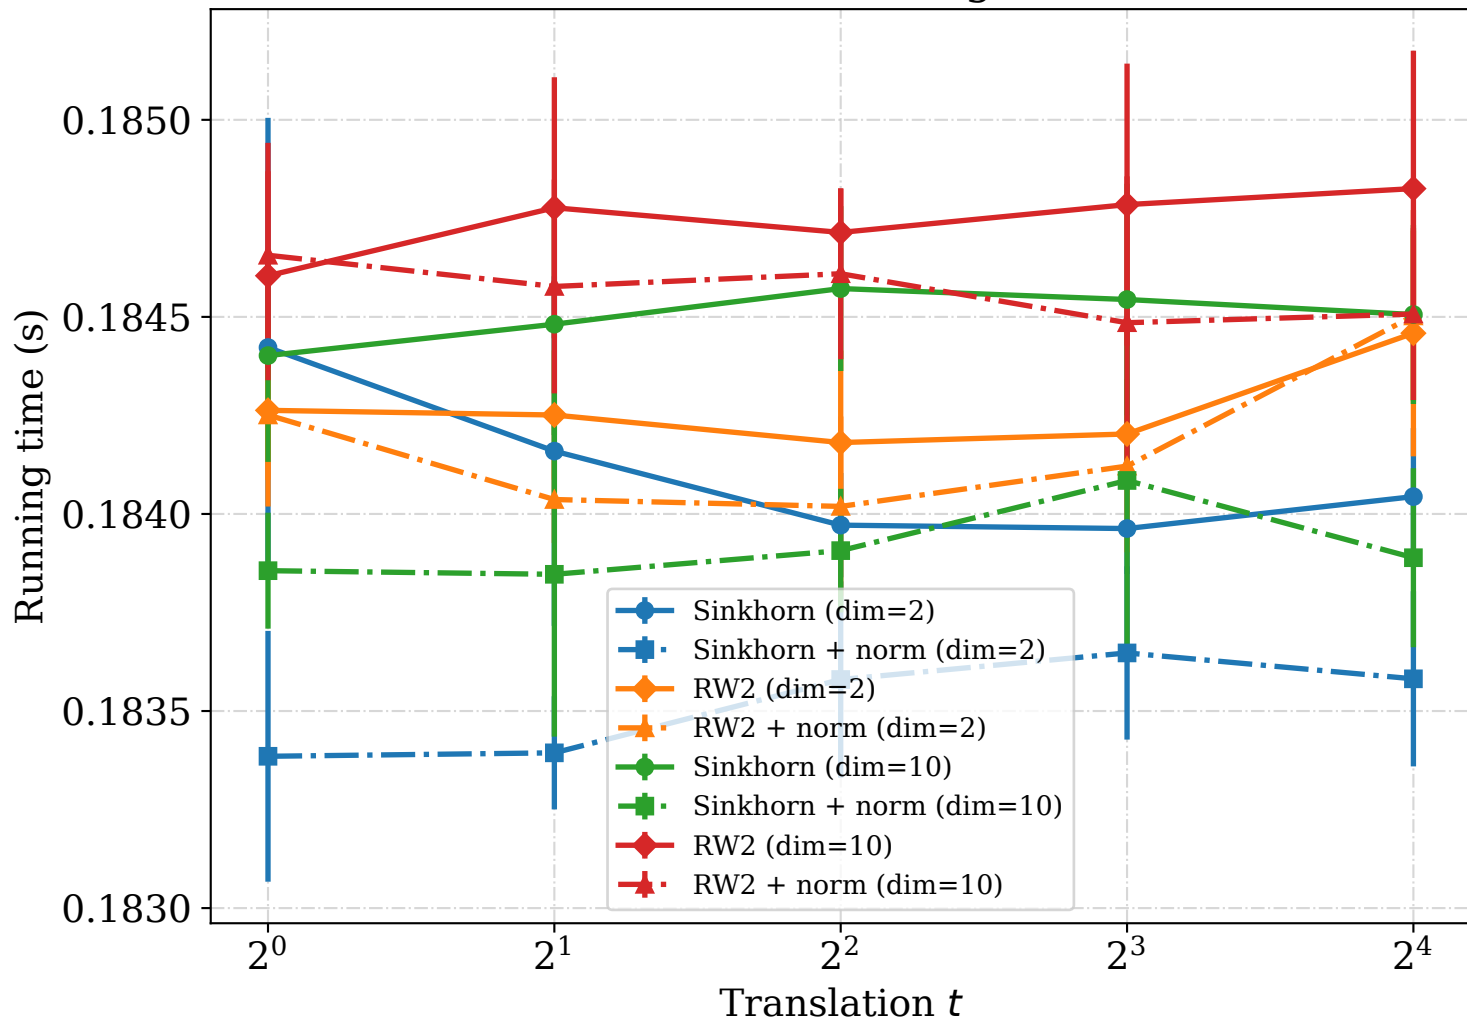

Supplement: supplementary_material [file Gaussian_vs_Geometric_time.pdf › exp2/results_figs/Gaussian_vs_Geometric_time.pdf]

# Gaussian vs Poisson (log<sub>2</sub>-log<sub>2</sub> scale)

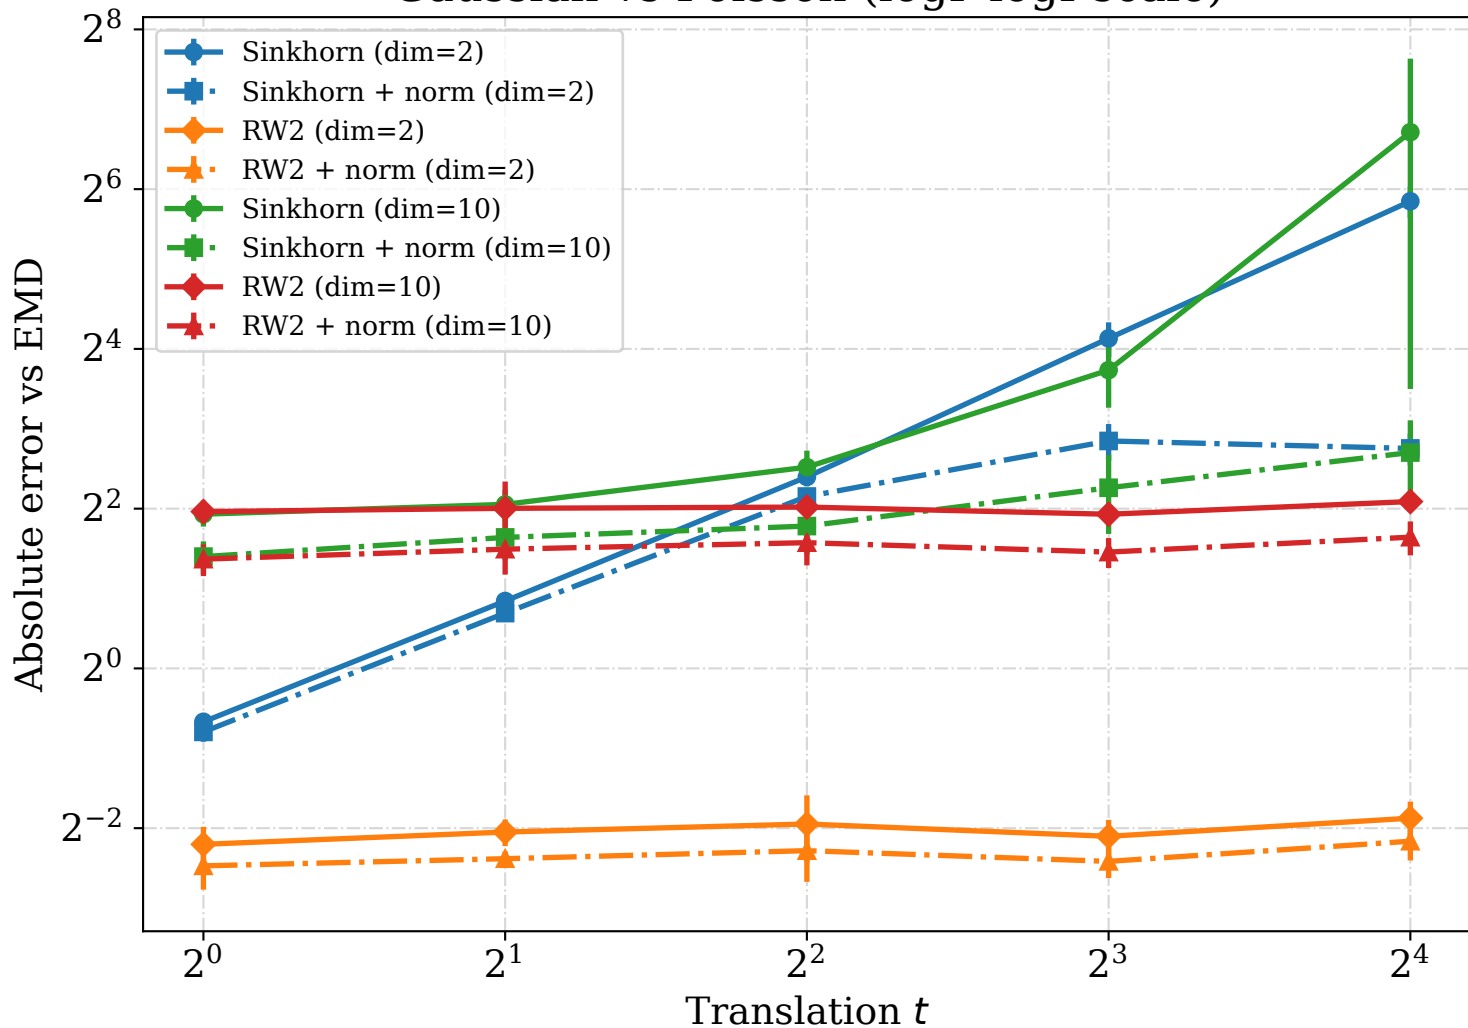

Supplement: supplementary_material [file Gaussian_vs_Poisson_error.pdf › exp2/results_figs/Gaussian_vs_Poisson_error.pdf]

# Gaussian vs Poisson (log<sub>2</sub>-linear scale)

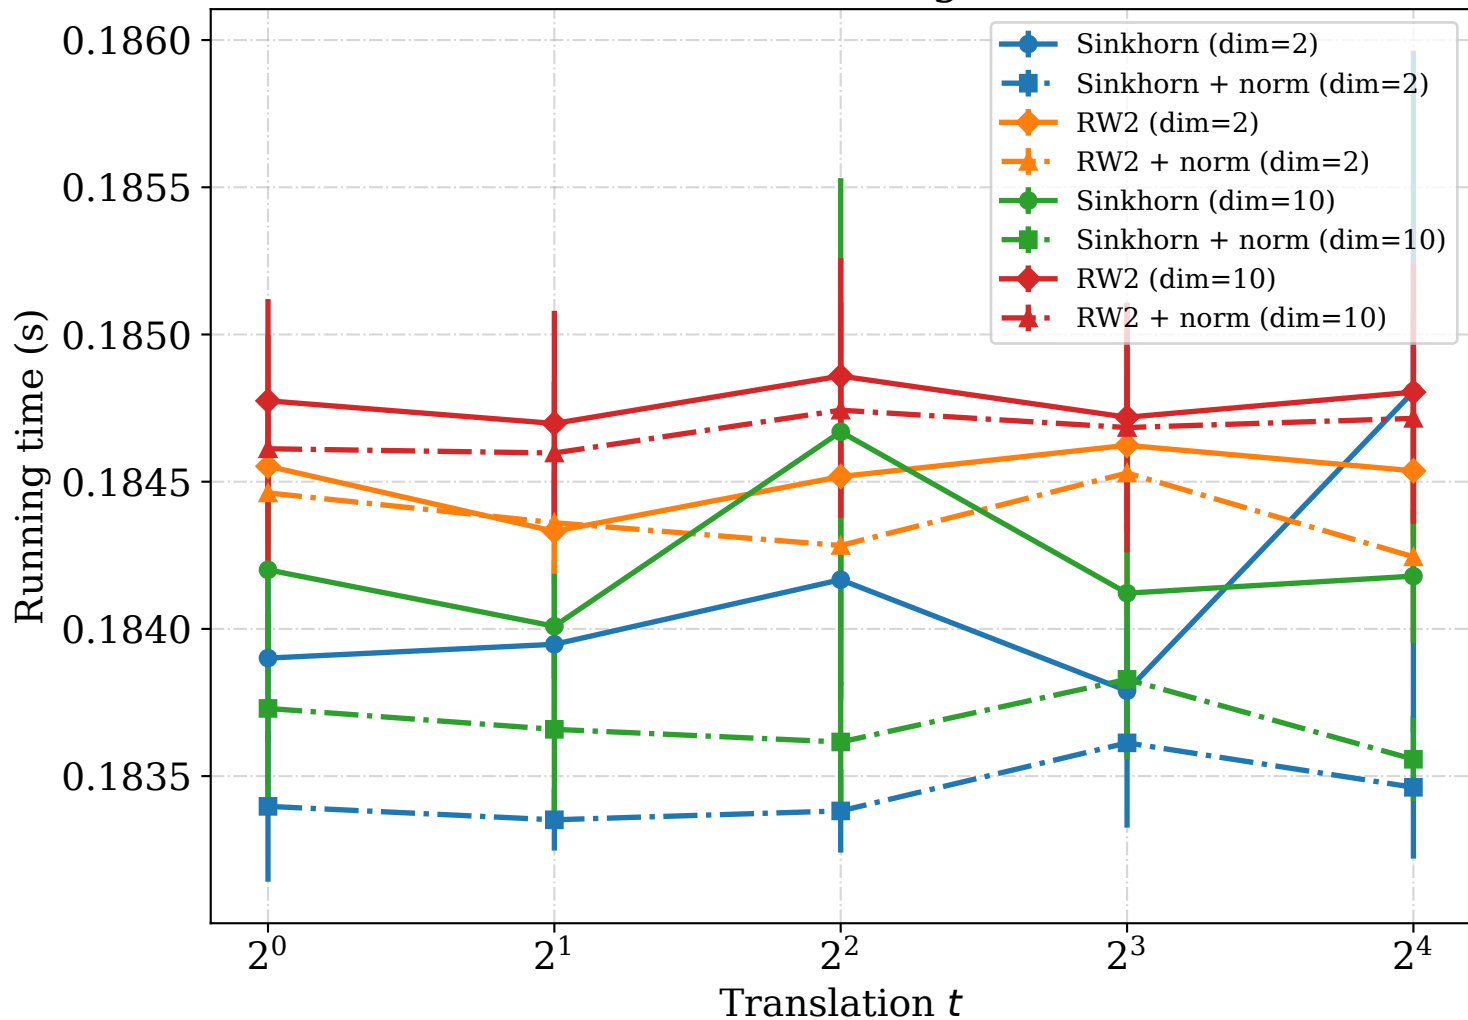

Supplement: supplementary_material [file Gaussian_vs_Poisson_time.pdf › exp2/results_figs/Gaussian_vs_Poisson_time.pdf]

# Gaussian vs Uniform ( $\log_2$ - $\log_2$ scale)

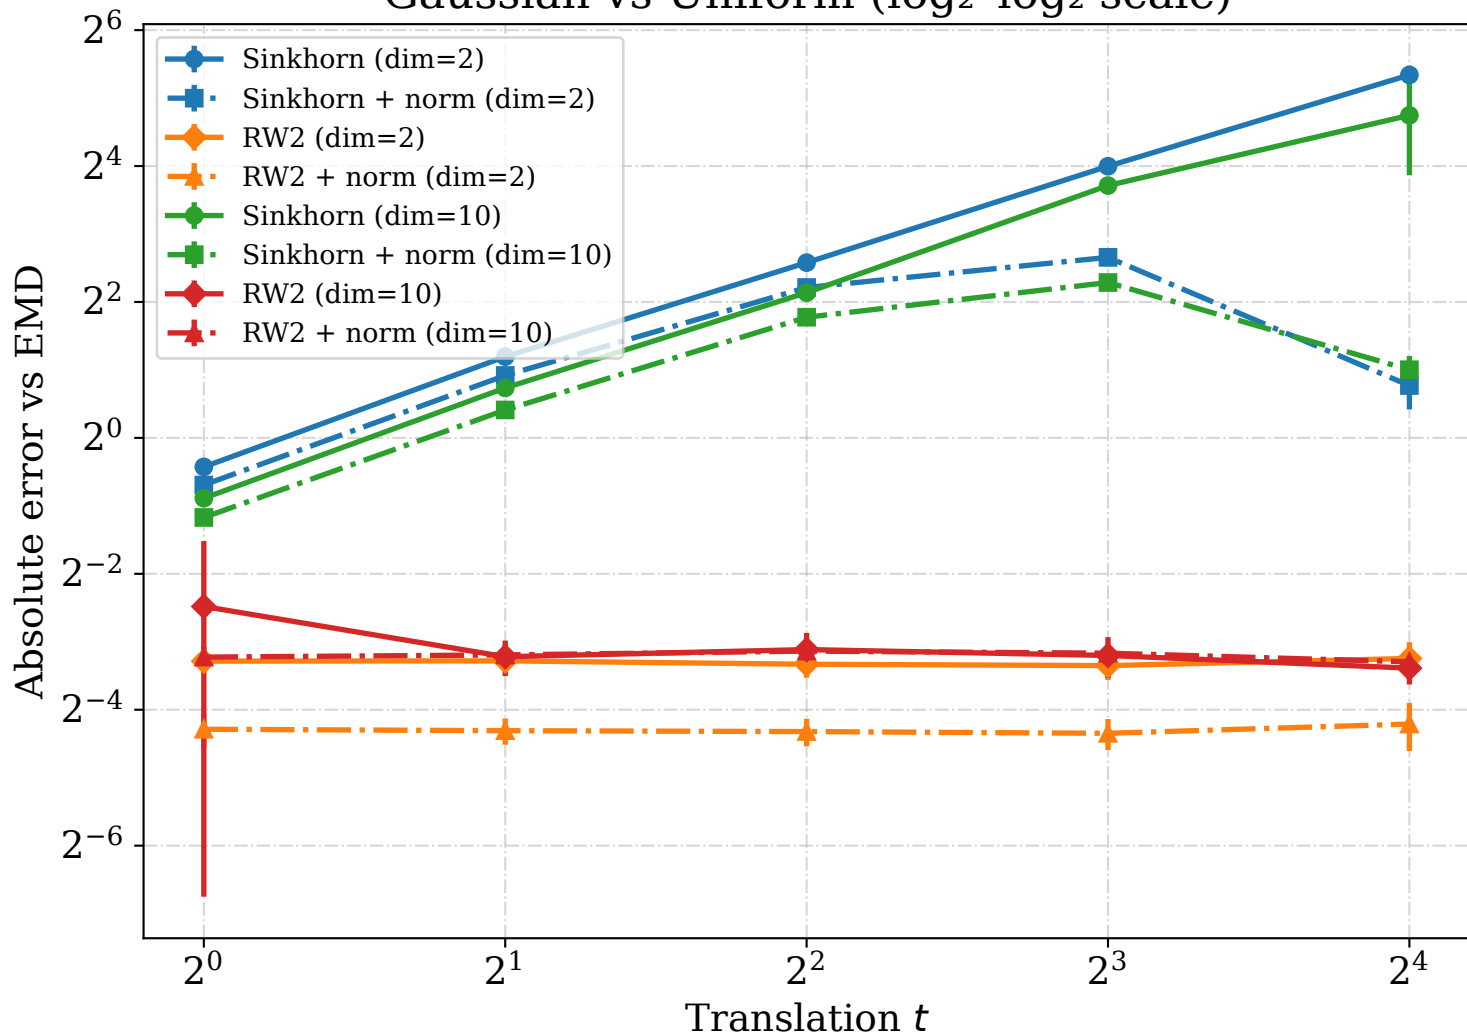

Supplement: supplementary_material [file Gaussian_vs_Uniform_error.pdf › exp2/results_figs/Gaussian_vs_Uniform_error.pdf]

# Gaussian vs Uniform (log<sub>2</sub>-linear scale)

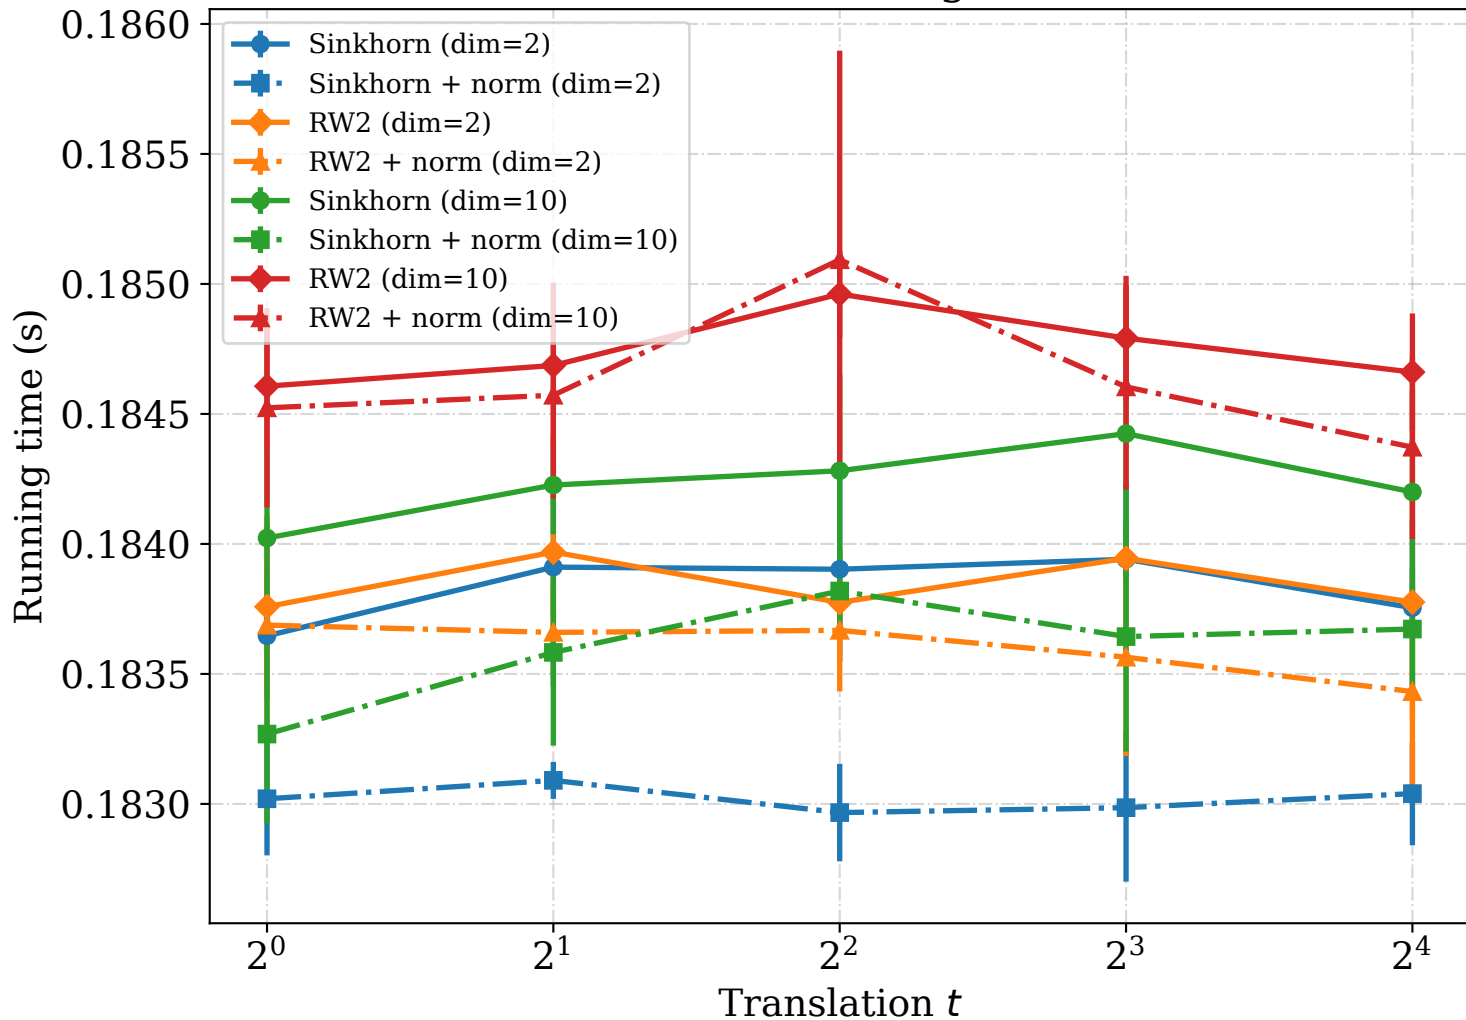

Supplement: supplementary_material [file Gaussian_vs_Uniform_time.pdf › exp2/results_figs/Gaussian_vs_Uniform_time.pdf]
